# Supplementary material
Source: HighWire-hosted journal article supplement (https://cmaj.ca/highwire/filestream/58630/field_highwire_adjunct_files/0/edit-national-1-at.pdf)
Supplement: edit-national-1-at.pdf [file edit-national-1-at.pdf]

## Appendix 1: References

1. MacKinnon NJ, Ip I. The National Pharmaceutical Strategy: Rest in peace, revive or renew? *CMAJ* 2009;180:801-3.
2. Gagnon MA. *The economic case for universal pharmacare: costs and benefits of publicly funded drug coverage for all Canadians*. Ottawa (ON): Canadian Center for Policy Alternatives; 2010. Available: [https://s3.amazonaws.com/policyalternatives.ca/sites/default/files/uploads/publications/National%20Office/2010/09/Universal\\_Pharmacare.pdf](https://s3.amazonaws.com/policyalternatives.ca/sites/default/files/uploads/publications/National%20Office/2010/09/Universal_Pharmacare.pdf) (accessed 2011 Apr. 20).
3. Kapur V, Basu K. Drug coverage in Canada: Who is at risk? *Health Policy* 2005;71:181-193.
4. The Commonwealth Fund. *The 2008 Commonwealth Fund International health policy survey of sicker adults*. New York (NY) The Fund; 2008.
5. Kennedy J, Morgan S. Cost-related prescription nonadherence in the United States and Canada: a system-level comparison using the 2007 International Health Policy Survey in seven countries. *Clin Ther* 2009;31:213-9.
6. Federal/Provincial/Territorial Ministerial Task Force. *National Pharmaceuticals Strategy progress report*. The Force: June 2006. Available: [www.hc-sc.gc.ca/hcs-sss/alt\\_formats/hpb-dgps/pdf/pubs/2006-nps-snpp/2006-nps-snpp-eng.pdf](http://www.hc-sc.gc.ca/hcs-sss/alt_formats/hpb-dgps/pdf/pubs/2006-nps-snpp/2006-nps-snpp-eng.pdf) (accessed 2011 Apr. 20).
7. Health Council of Canada. *A status report on the National Pharmaceuticals Strategy: a prescription unfilled*. Toronto (ON): The Council; 2009. Available: [www.healthcouncilcanada.ca/docs/rpts/2009/HCC\\_NPS\\_StatusReport\\_web.pdf](http://www.healthcouncilcanada.ca/docs/rpts/2009/HCC_NPS_StatusReport_web.pdf) (accessed 2011 Apr. 20).

Appendix to: Stanbrook MB, Hébert PC, Coutts J, et al. Can Canada get on with national pharmacare already? *CMAJ* 2011. DOI:10.1503/cmaj.110643.

Copyright © 2011 Canadian Medical Association or its licensors
